# Supplementary material for: Antifungal Mechanism of Metabolites from Newly Isolated Streptomyces sp. Y1-14 against Banana Fusarium Wilt Disease Using Metabolomics
Source: MDPI journal article supplement (doi:10.3390/jof8121291), 2022-12-09
Supplement: s1 [file s1]

SUPPLEMENTARY MATERIAL

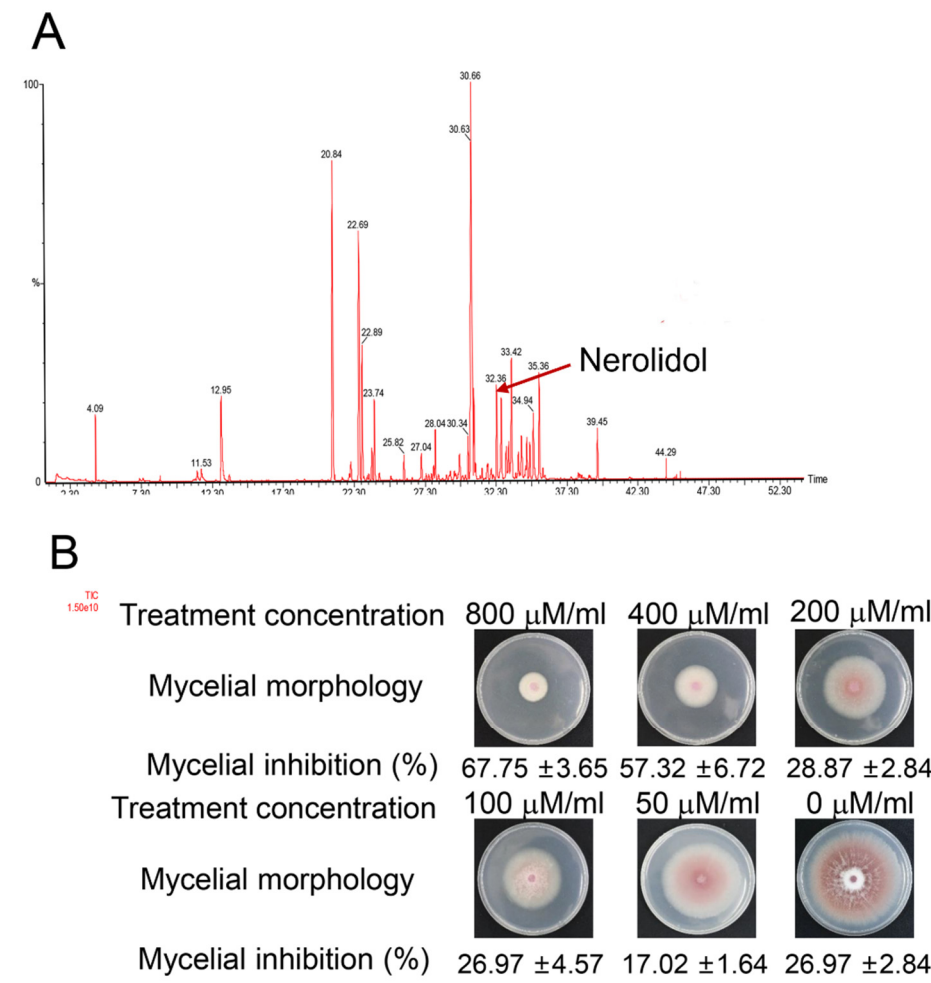

Figure S1 | Determination and analysis of VOCs of strain Y1-14 and validation of active components.

(A) Total ion current chromatograms of VOCs of strain Y1-14. The red arrow represents nerolidol.

(B) Antifungal activity against Foc TR4 of different concentrations of Nerolidol.

A

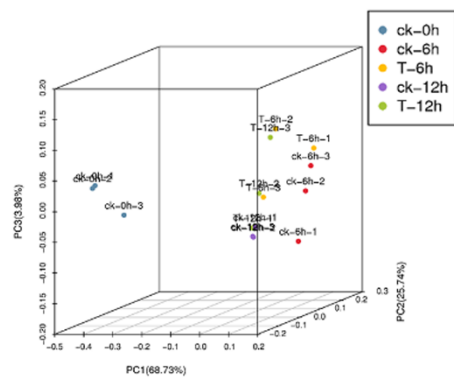

B

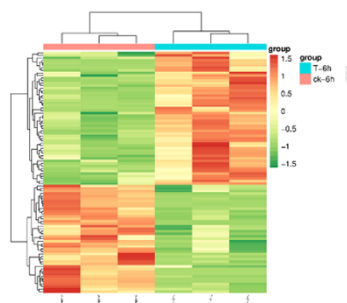

C

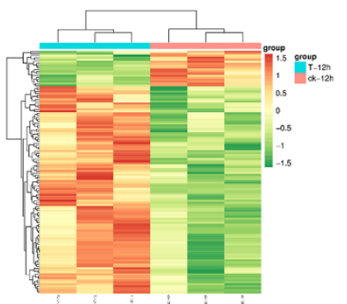

D

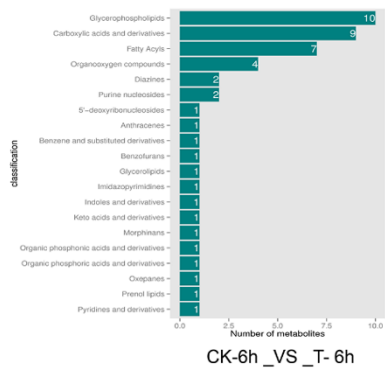

E

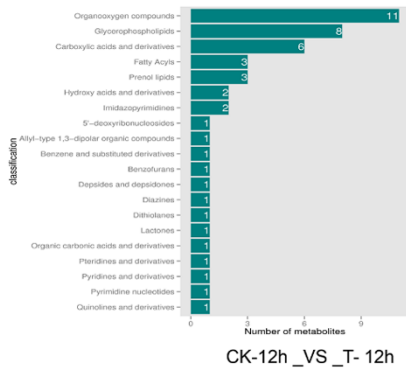

Figure S2 | Effects of strain Y1-14 Extracts on Foc TR4 Metabolites. (A) PCA-3D diagram of all samples. (B-C) Heatmap based on the metabolome data of Foc TR4 treated with extracts of Y1-14 and untreated at 6h and 12h. (D-E) HMDB classification diagram of different metabolites in each group.

**Table S1.** Growth characteristics of strain Y1-14 on different solid culture media

| Medium | Aerial mycelium | Vegetative mycelium | Soluble pigment | Growth | Colony                                                                              |
|--------|-----------------|---------------------|-----------------|--------|-------------------------------------------------------------------------------------|
| ISP3   | Mint cream      | White               | None            | ++     |  |
| ISP4   | Mint cream      | Burlywood           | Grey            | ++     |  |
| ISP5   | Beige           | Mint cream          | None            | ++     |  |
| ISP6   | Mint cream      | Wheat               | Pink            | +      |  |
| ISP7   | Mint cream      | Burlywood           | None            | ++     |  |
| PDA    | Mint cream      | lemon yellow        | None            | ++     |  |

+ good growth; ++ better growth; +++ best growth

**Table S2.** Physiological and biochemical characteristics of strain Y1-14

| Characteristics               | Results |
|-------------------------------|---------|
| pH range for growth           | 4-10    |
| NaCl tolerance for growth (%) | 0-5     |
| H <sub>2</sub> S production   | +       |
| Milk peptonization            | +       |
| Starch hydrolysis             | +       |
| Cellulose hydrolysis          | +       |
| Gelatin liquefaction          | -       |
| Nitrate reduction             | -       |

+, Positive reaction; –, Negative reaction

**Table S3.** Carbon and nitrogen utilization characteristics of strain Y1-14

| Nitrogen Source Utilization |        | Carbon Source Utilization |        |
|-----------------------------|--------|---------------------------|--------|
| Nitrogen Source             | Result | Carbon Source             | Result |
| L-arginine                  | +      | Salicylicin               | -      |
| Tyrosine                    | +      | D-Cellobiose              | +      |
| Aspartamide                 | +      | Raffinose                 | +      |
| Thiine                      | +      | D-Galactose               | +      |
| ammonium nitrate            | +      | D-Glucose                 | +      |
| L-Glutamic acid             | -      | Sorbitol                  | +      |
| L (+)-cysteine              | +      | D-Sorbitol                | +      |
| Phenylalanine               | +      | D-Fructose                | +      |
| D-Mannitol                  | +      | Soluble starch            | +      |
| Inositol                    | -      | Trisaccharide             | +      |
| Rhamnose                    | +      | Anhydrous amino acid      | -      |
| Sodium propionate           | +      | Ribose                    | +      |

+, Positive reaction; -, Negative reaction
